# Supplementary material for: The design, synthesis and evaluation of high affinity macrocyclic carbohydrate inhibitors
Source: Royal Society of Chemistry journal article supplement (doi:10.1039/b416105j), 2005-01-01

## Supplementary data

### The design, synthesis, and evaluation of high affinity macrocyclic carbohydrate inhibitors

Robert S. McGavin , Rod A. Gagne, Mary C. Chervenak, David R. Bundle\*<sup>a</sup>

Supporting Information

Figure 1

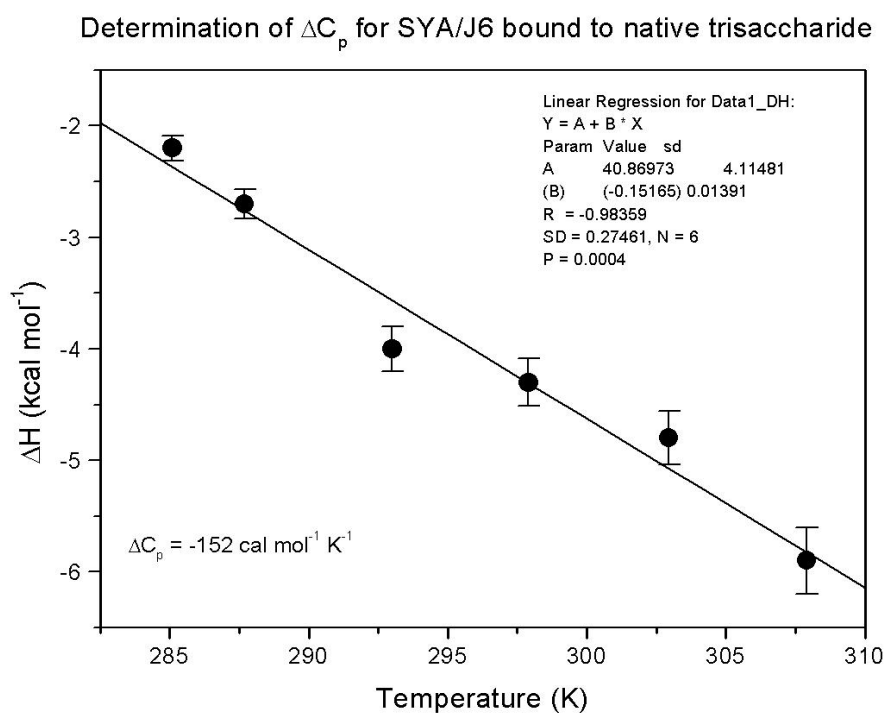

Figure 2

Entropy-Enthalpy Compensation:  $-\Delta H$  vs.  $-T\Delta S$   
for Trisaccharide **1** and SYA/J6.

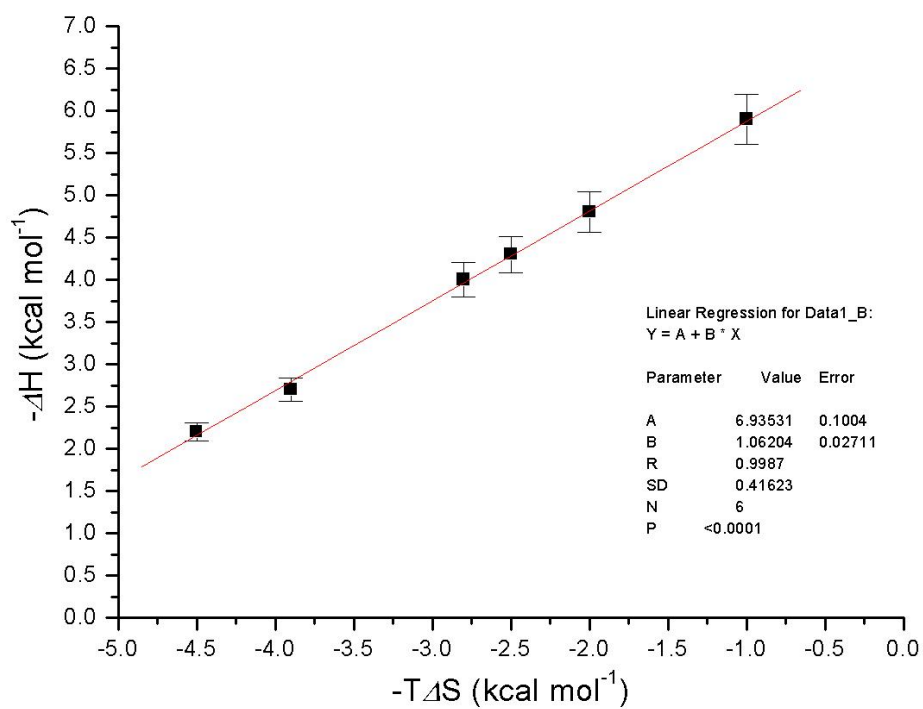

Supplement: b416105j.pdf [file b416105j.pdf]
